# Supplementary material for: Dynamics of Germinosome Formation and FRET-Based Analysis of Interactions between GerD and Germinant Receptor Subunits in Bacillus cereus Spores
Source: MDPI journal article supplement (doi:10.3390/ijms222011230), 2021-10-18
Supplement: s1 [file s1]

# Dynamics of germinosome formation and FRET-based analysis of interactions between GerD and germinant receptor subunits in *Bacillus cereus* spores

## Supplementary Materials

**Table S1.** Average FRET efficiency in individual spores of various strains normalized by donor channel as described in Methods.

| Fusion protein(s) from plasmid* |                 | Names of plasmid | Number of spores | mean  | 95%CI Mean    |
|---------------------------------|-----------------|------------------|------------------|-------|---------------|
| <b>negative control</b>         |                 |                  |                  |       |               |
| SASP-SGFP2                      | GerD-mScarlet-I | pHT315-f13       | 191              | 0     | 0 ~ 0         |
| <b>positive control</b>         |                 |                  |                  |       |               |
| GerD-SGFP2-mScarlet-I           |                 | pHT315-f11       | 237              | 0.08  | 0.07 ~ 0.08   |
| <b>interaction</b>              |                 |                  |                  |       |               |
| GerR(A-C-B)-SGFP2               | GerD-mScarlet-I | pHT315-f06       | 489              | 0.06  | 0.06 ~ 0.07   |
| GerRB-SGFP2                     | GerD-mScarlet-I | pHT315-f09       | 179              | 0.02  | 0.02 ~ 0.02   |
| GerRA-SGFP2                     | GerD-mScarlet-I | pHT315-f07       | 323              | -0.04 | -0.05 ~ -0.04 |
| GerRC-SGFP2                     | GerD-mScarlet-I | pHT315-f08       | 81               | -0.01 | -0.01 ~ 0     |

\*A shuttle vector originally for *E. coli* and *B. thuringiensis*.

**Table S2.** Primers used in this study

| primers  | sequence                                                     | purpose or function                       |
|----------|--------------------------------------------------------------|-------------------------------------------|
| 315_YW1  | CGGGGTACCCACCTTCCCTATATCCGCT                                 | <i>Kpn</i> I- <i>gerR</i> promoter-Fw     |
| 315_YW2  | CCGGAATTCACCTTCCCTATATCCGCT                                  | <i>Eco</i> R I- <i>gerR</i> promoter-Fw   |
| 315_YW3  | CGGGATCCTCTCACCCCTAACATATATC                                 | <i>Bam</i> H I- <i>gerR</i> promoter-Rv   |
| 315_YW4  | CGGGATCCATGTTTCGGTTTATCATCT                                  | <i>Bam</i> H I- <i>gerRA</i> -Fw          |
| 315_YW5  | CTCGCCCTTGCTCACCATgctgccgctgccgctgccT<br>TCATTCTCACCATCACGTT | <i>gerRA</i> -(GS) <sub>3</sub> -SGFP2-Rv |
| 315_YW6  | AACGTGATGGTGAGAATGAAGgcagcggcagcg<br>gcagcATGGTGAGCAAGGGCGAG | <i>gerRA</i> -(GS) <sub>3</sub> -SGFP2-Fw |
| 315_YW7  | CGGGATCCGAATGAATGAAGAAAATTTTA                                | <i>Bam</i> H I- <i>gerRC</i> -Fw          |
| 315_YW8  | CTCGCCCTTGCTCACCATgctgccgctgccgctgccT<br>TCCCCGATTCCAGATTGT  | <i>gerRC</i> -(GS) <sub>3</sub> -SGFP2-Rv |
| 315_YW9  | ACAATCTGGAATCGGGGAAGgcagcggcagcggc<br>agcATGGTGAGCAAGGGCGAG  | <i>gerRC</i> -(GS) <sub>3</sub> -SGFP2-Fw |
| 315_YW10 | CGGGATCCTGAGGTGAAATGAGCAATGA                                 | <i>Bam</i> H I- <i>gerRB</i> -Fw          |
| 315_YW11 | CTCGCCCTTGCTCACCATgctgccgctgccgctgccA<br>GGTGTATCGGTTGAAGA   | <i>gerRB</i> -(GS) <sub>3</sub> -SGFP2-Rv |
| 315_YW12 | TCTTCAACCGATACACCTggcagcggcagcggcagc<br>ATGGTGAGCAAGGGCGAG   | <i>gerRB</i> -(GS) <sub>3</sub> -SGFP2-Fw |
| 315_YW13 | CCCAAGCTTTTACTTGTACAGCTCGTCCAT                               | SGFP2- <i>Hind</i> III-Rv                 |

|          |                                                               |                                             |
|----------|---------------------------------------------------------------|---------------------------------------------|
| 315_YW14 | AATCTGGAATCGGGGAATAGTGAGGTGAA<br>ATGAGCAATG                   | <i>gerRC-gerRB-Fw</i>                       |
| 315_YW15 | CATTGCTCATTTCACCTCACTATTCCCCGAT<br>TCCAGATT                   | <i>gerRC-gerRB-Rv</i>                       |
| 315_YW16 | <u>GCTCTAG</u> ACAACCATAAAGAACAGAGC                           | <i>Xba I-gerD promoter-Fw</i>               |
| 315_YW17 | TTCTCCTTTACTCACCATgctgccgtgccgtgccCT<br>GTTCTTCCTTCTTCTCG     | <i>gerD-(GS)<sub>3</sub>-mScarlet-I-Rv</i>  |
| 315_YW18 | CGAGAAGAAGGAAGAACAGggcagcggcagcgg<br>cagcATGGTGAGTAAAGGAGAA   | <i>gerD-(GS)<sub>3</sub>-mScarlet-I-Fw</i>  |
| 315_YW19 | <u>GCTCTAG</u> ATTATTTGTATAGTTCATCCAT                         | <i>mScarlet-I-Xba I-Rv</i>                  |
| 315_YW20 | CCGGAATTCTTATTTGTATAGTTCATCCAT                                | <i>mScarlet-I-EcoR I-Rv</i>                 |
| 315_YW21 | <u>GCTCTAG</u> ACACCTTCCCTATATCCGCT                           | <i>Xba I-gerR promoter-Fw</i>               |
| 315_YW22 | GCTGAAAGGAGTTCCAACCTTATGAAACGGA<br>TGCTATT                    | <i>gerD promoter-gerD-Fw</i>                |
| 315_YW23 | AATAGCATCCGTTTCATAAGTTGGAACCTC<br>TTTCAGC                     | <i>gerD promoter-gerD-Rv</i>                |
| 315_YW24 | GCATGGACGAGCTGTACAAGggcagcggcagc<br>gcagcATGGTGAGTAAAGGAGAA   | <i>SGFP2-(GS)<sub>3</sub>-mScarlet-I-Fw</i> |
| 315_YW25 | TTCTCCTTTACTCACCATgctgccgtgccgtgccCT<br>TGTACAGCTCGTCCATGC    | <i>SGFP2-(GS)<sub>3</sub>-mScarlet-I-Rv</i> |
| 315_YW26 | <u>CCCAAGC</u> TTTTATTTGTATAGTTCATCCAT                        | <i>mScarlet-I-Hind III-Rv</i>               |
| 315_YW27 | <u>GGGGTACC</u> CTTCACCTTGTTCCGTTT                            | <i>Kpn I-SASP promoter-Fw</i>               |
| 315_YW28 | CAATTAGGCGGTTACCAAAAaggcagcggcagc<br>ggcagcATGGTGAGCAAGGGCGAG | <i>SASP-(GS)<sub>3</sub>-SGFP2-Fw</i>       |
| 315_YW29 | CTCGCCCTTGCTCACCATgctgccgtgccgtgccT<br>TTTTGGTAACCGCCTAATTG   | <i>SASP-(GS)<sub>3</sub>-SGFP2-Rv</i>       |
| 315_YW30 | <u>GGGGTACC</u> ACAACCATAAAGAACAGAGC                          | <i>Kpn I-gerD promoter-Fw</i>               |
| 315_YW31 | CTCGCCCTTGCTCACCATgctgccgtgccgtgccC<br>TGTTCTTCCTTCTTCTCG     | <i>gerD-(GS)<sub>3</sub>-SGFP2-Rv</i>       |
| 315_YW32 | CGAGAAGAAGGAAGAACAGggcagcggcagcgg<br>cagcATGGTGAGCAAGGGCGAG   | <i>gerD-(GS)<sub>3</sub>-SGFP2-Fw</i>       |
| 315_YW33 | CTCTTCGCTATTACGCCA                                            | T vector-sequencing-Fw                      |
| 315_YW34 | TCACACAGGAAACAGCTA                                            | T vector-sequencing-Rv                      |
| 315_YW35 | ATGTTGTGTGGAATTGTGAG                                          | 315-sequencing-Fw                           |
| 315_YW36 | AAGGCGATTAAGTTGGGT                                            | 315-sequencing-Rv                           |
| 315_YW37 | CAAAGACCCCAACGAGAA                                            | SGFP2-sequencing-Fw                         |
| 315_YW38 | GCTGGGGAAAATAAGTATGA                                          | <i>gerRC</i> -sequencing-Fw                 |
| 315_YW39 | GCGCTACAATCCAAACAAA                                           | <i>gerRA</i> -sequencing-Fw                 |
| 315_YW40 | CCGGAATTCATGAAACGGATGCTATTC                                   | <i>EcoR I-gerD-Fw</i>                       |
| 315_YW41 | CGTTTTGGACTAGGGATG                                            | <i>gerD promoter-sequencing-Rv</i>          |

a. Restriction cleavage sites are underlined.

b. The flexible linker (GS)<sub>3</sub> coding sequence is written in lower-case letters.

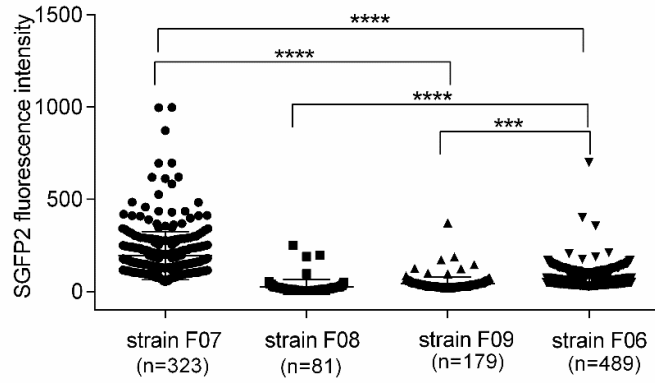

Fig S1. The SGFP2 fluorescence intensities of individual dormant spores of *B. cereus* with wide-field microscopic imaging. The SGFP2 fluorescence intensities of strains F07 (GerRA-SGFP2 and GerD-mScarlet-I), F08 (GerRC-SGFP2 and GerD-mScarlet-I), F09 (GerRB-SGFP2 and GerD-mScarlet-I), and F06 (GerR(A-C-B)-SGFP2 and GerD-mScarlet-I) were measured by the ObjectJ plugin SporeAnalyzer\_1c.ojj. \*\*\*:  $p < 0.001$  and \*\*\*\*:  $p < 0.0001$ .
